# Supplementary material for: Persistent TFIIH binding to non-excised DNA damage causes cell and developmental failure
Source: PubMed Central journal article supplement (PMC11045817; doi:10.1038/s41467-024-47935-9), 2024-04-25
Supplement: 41467_2024_47935_MOESM1_ESM.pdf [file 41467_2024_47935_MOESM1_ESM.pdf]

## Supplementary Materials for

# Persistent TFIID binding to non-excised DNA damage causes cell and developmental failure

Alba Muniesa-Vargas<sup>1,3</sup>, Carlota Davó-Martínez<sup>1,3</sup>, Cristina Ribeiro-Silva<sup>1,3</sup>, Melanie van der Woude<sup>1</sup>, Karen L. Thijssen<sup>1</sup>, Ben Haspels<sup>2</sup>, David Häckes<sup>1</sup>, Ülkem U. Kaynak<sup>1</sup>, Roland Kanaar<sup>2</sup>, Jurgen A. Marteijn<sup>2</sup>, Arjan F. Theil<sup>1</sup>, Maayke M. P. Kuijten<sup>2</sup>, Wim Vermeulen<sup>1</sup>, Hannes Lans<sup>1,\*</sup>

1. Department of Molecular Genetics, Erasmus MC Cancer Institute, Erasmus University Medical Center, 3015 GD, Rotterdam, The Netherlands

2. Department of Molecular Genetics, Erasmus MC Cancer Institute, Oncode Institute, Erasmus University Medical Center, 3015 GD, Rotterdam, The Netherlands

3. These authors contributed equally

\*Correspondence: [w.lans@erasmusmc.nl](mailto:w.lans@erasmusmc.nl)

### This PDF file includes:

Supplementary Text

Supplementary Figures 1 to 3

Supplementary Tables 1 to 4

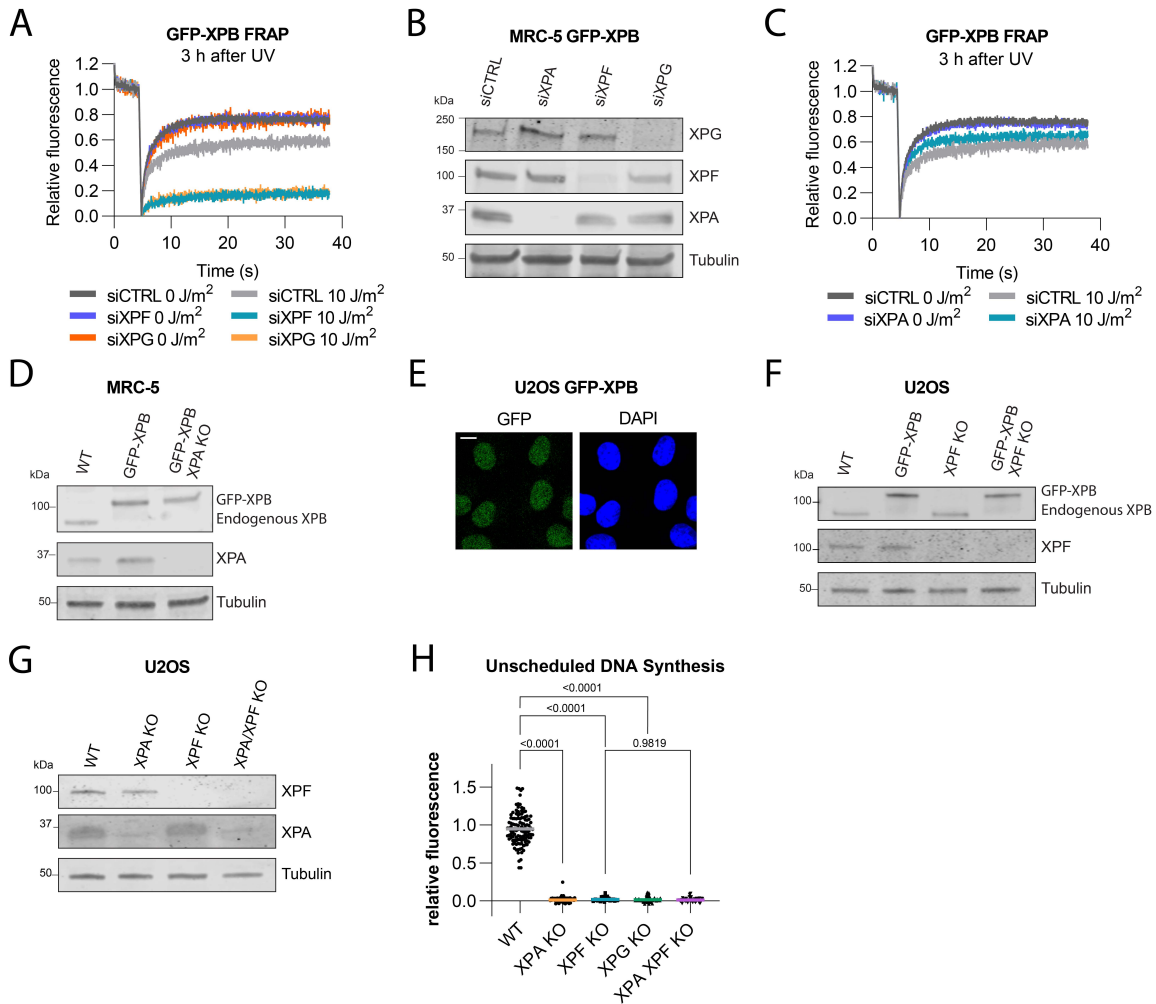

**Supplementary Figure 1. FRAP, UDS and immunoblot analyses of knock-in and knock-out cell lines.** **(A)** FRAP of GFP-tagged XPB in MRC-5 cells treated with control (CTRL), XPF or XPG siRNA, non-irradiated (0 J/m<sup>2</sup>) or 3 h after UV (10 J/m<sup>2</sup>); Each FRAP curve represents the average of three independent experiments. Quantification and number of cells are shown in Figure 1C and legend. **(B)** Immunoblot of GFP-XPB MRC-5 cells treated with control, XPA, XPF or XPG siRNA, stained with antibodies against XPG, XPF, XPA and tubulin (loading control). **(C)** FRAP of GFP-tagged XPB in MRC-5 cells treated with control or XPA siRNA, non-irradiated (0 J/m<sup>2</sup>) or 3 h after UV (10 J/m<sup>2</sup>); Each FRAP curve represents the average of three independent experiments. Quantification and number of cells are shown in Figure 1C and legend. **(D)** Immunoblot of wild type (WT) and GFP-XPB knock-in MRC-5 cells, proficient for XPA or with XPA knockout (KO), stained with antibodies against XPB, tubulin (loading control) and XPA. **(E)** Representative immunofluorescence image of U2OS GFP-XPB knock-in cells. DNA was stained with DAPI. Scale bar, 10  $\mu$ m. **(F)** Immunoblot of wild type (WT) and XPF knockout (KO) U2OS cells without or with GFP-XPB knock-in, stained with antibodies against XPB, XPF and tubulin (loading control). **(G)** Immunoblot of wild type (WT), XPA knockout (KO), XPF KO and double XPA/XPF KO U2OS cells, stained with antibodies against XPF, XPA and tubulin (loading control). **(H)** Unscheduled DNA synthesis analysis of wild type (WT), XPA knockout (KO); also expressing GFP-XPB), XPF KO, XPG KO and double XPA/XPF KO U2OS cells, irradiated with 16 J/m<sup>2</sup> UV. Mean with SEM of three independent experiments. Numbers represent p-values (ANOVA corrected for multiple comparisons). *n* (left to right)=119, 172, 172, 117, 105. Immunoblots and immunofluorescence experiments were replicated with similar results. Source data are provided as a Source Data file.

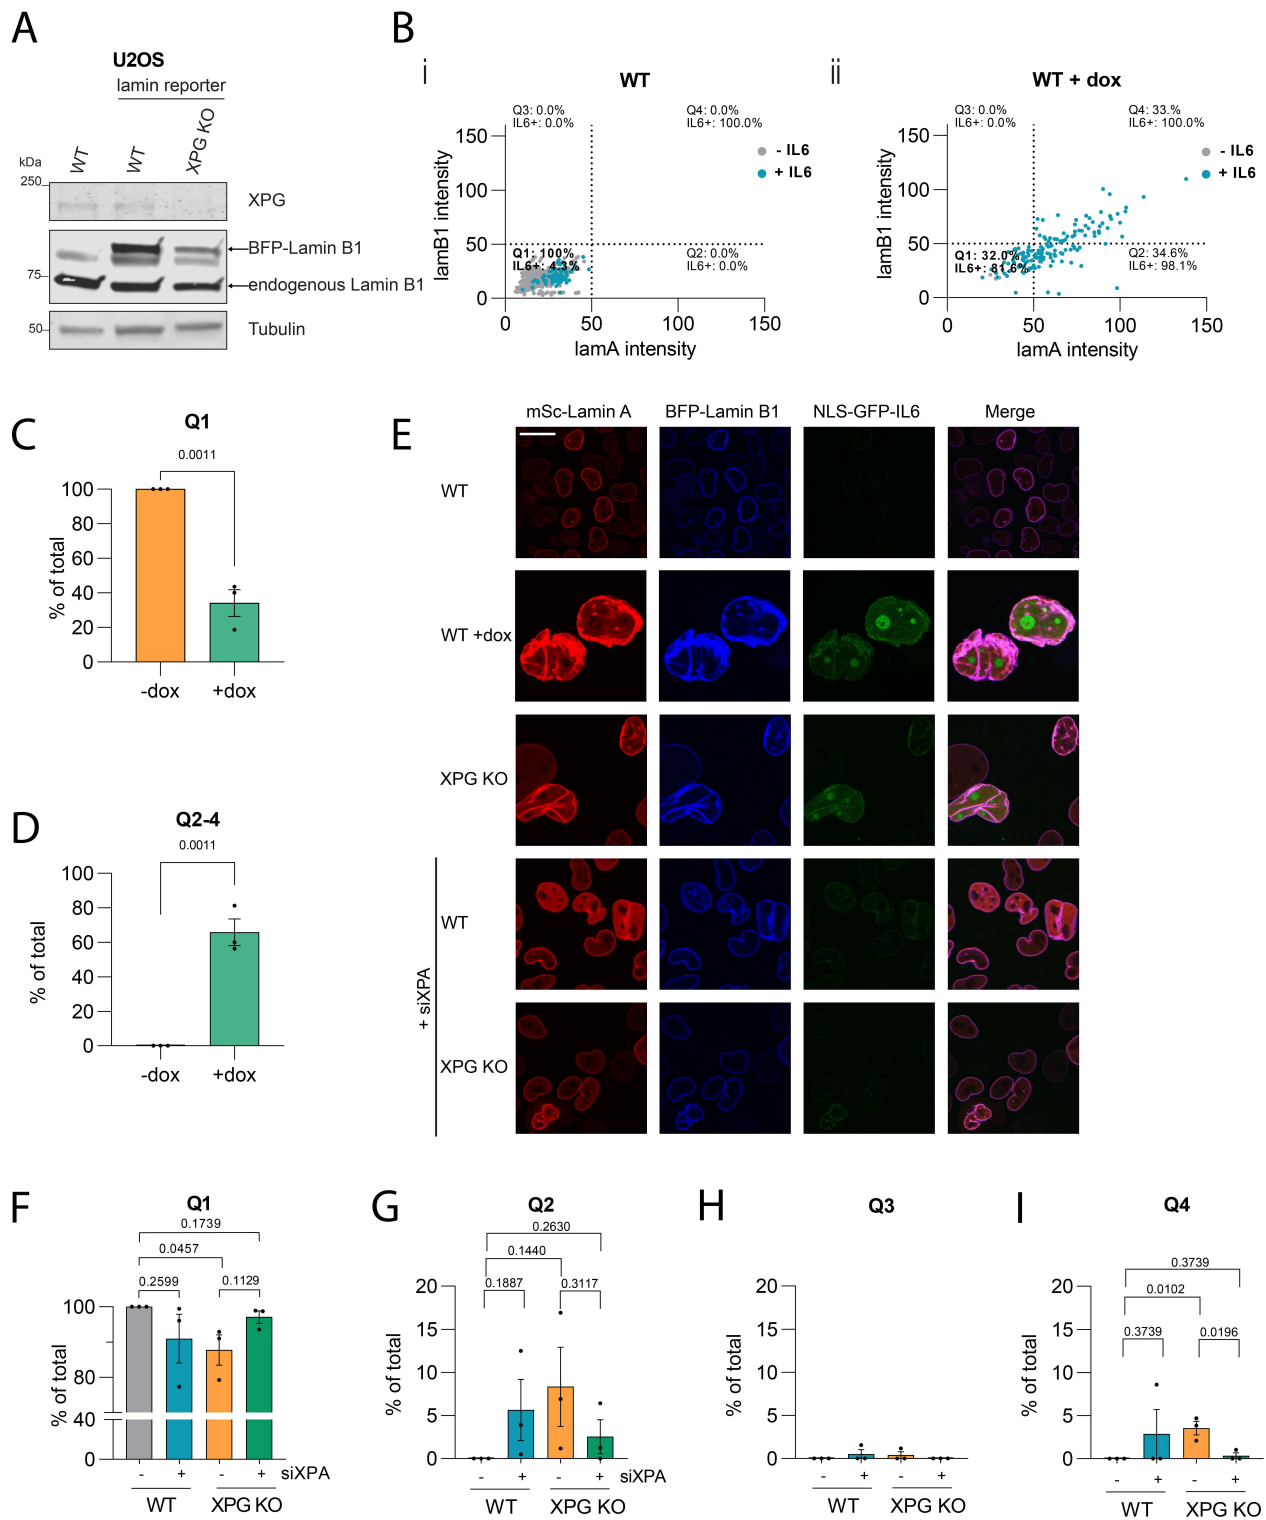

**Supplementary Figure 2. Lamin and IL-6-based senescence reporter plasmid. (A)** Immunoblot of control and transgenic wild type (WT) and XPG knockout (KO) cells stably expressing the lamin-based senescence reporter plasmid, stained with antibodies against XPG, lamin B1 and tubulin (loading control). Immunoblot was replicated with similar result. **(B)** Scatter plot showing relative mScarlet-Lamin A (lamA) and BFP-Lamin B1 (lamB1) intensities in wild type (WT) U2OS cells (i) without treatment or (ii) after 2 h 1  $\mu$ M doxorubicin treatment (+dox). Each dot represents a cell. Blue color indicates senescence-associated induction of GFP-IL6. Grey color indicates no GFP-IL6 expression. Scatter plot is divided in four quadrants (Q1-Q4) and percentage of cells in each quadrant and percentage of IL6 positive cells (IL6+) is indicated per quadrant.  $n=2109$  for WT and  $n=153$  for WT +dox. Cells from three replicate experiments are shown. **(C and D)** Graphs showing average percentage (with SEM) of cells in Q1 or in Q2, Q3 and Q4 (Q2-4) from three independent replicate experiments, after no treatment (-dox) or 2 h treatment of 1  $\mu$ M doxorubicin. **(E)** Representative images of untreated wild type (WT), doxorubicin-treated WT (+dox), untreated XPG knockout (KO) and siXPA-treated WT and XPG KO U2OS cells stably expressing the mScarlet-Lamin A/BFP-Lamin B1/GFP-IL6 senescence reporter plasmid. Scale bar, 25  $\mu$ m. **(F-I)** Graphs showing the average percentage (with SEM) of WT or XPG KO U2OS cells, without or with siXPA treatment, in Q1 (F), Q2 (G), Q3 (H) or Q4 (I), from three independent replicate experiments. Numbers represent p-values (unpaired two-sided t-test). Source data are provided as a Source Data file.

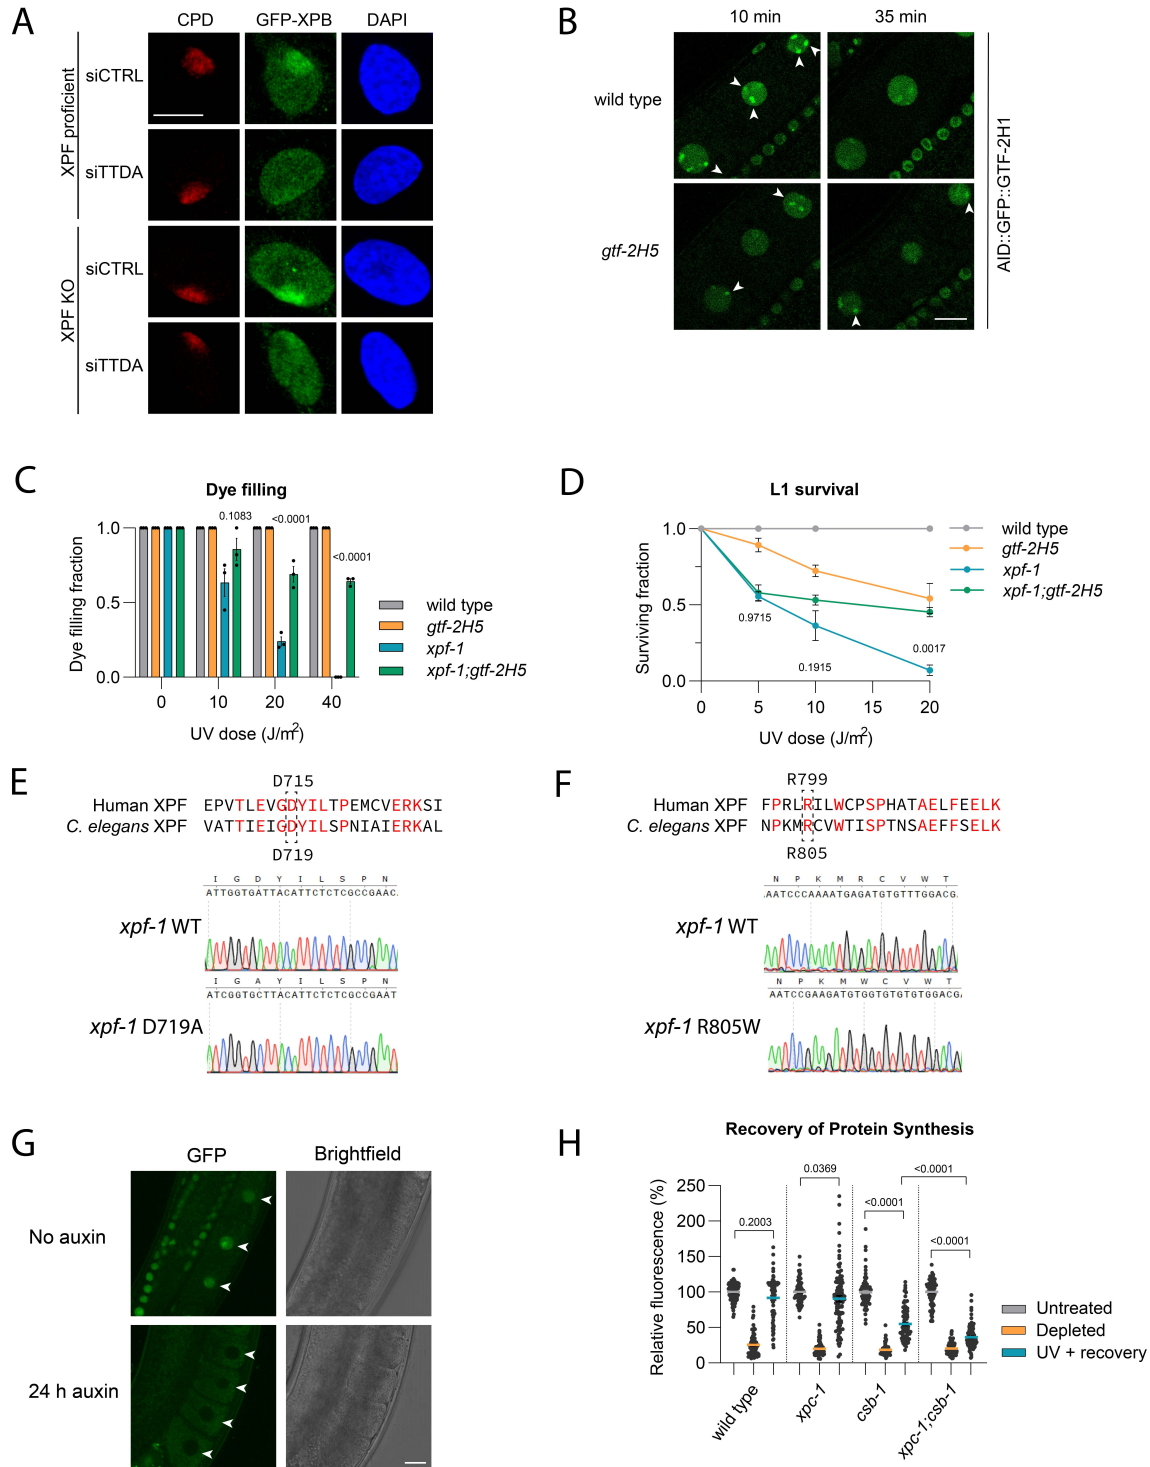

**Supplementary Figure 3. TTDA/GTF-2H5-dependent prolonged TFIIH binding to DNA damage impairs neuron functionality in *C. elegans*.** (A) Immunofluorescence of XPF proficient and knockout (KO) U2OS GFP-XPB cells, treated with control or TTDA siRNA, 30 min after 60 J/m<sup>2</sup> UV-C through a microporous filter to induce LUD. Images show GFP-XPB accumulation at LUD marked by anti-CPD staining. DNA is stained with DAPI. Scale bar, 10  $\mu$ m. Immunofluorescence was replicated with similar result (B) Recruitment of AID-GFP-tagged GTF-2H1 to UV-B-damaged chromosomes in *C. elegans* oocytes (arrowheads) of living wild type or *gtf-2H5* animals, 15 and 35 minutes after 300 J/m<sup>2</sup> UV-B irradiation. Scale bar, 10  $\mu$ m. (C) Fraction of dye filling wild type, *xpf-1*, *gtf-2H5* and *xpf-1;gtf-2H5* animals, 72 h after different UV-B dose. Mean with SEM of three independent experiments. Numbers represent p-values (ANOVA corrected for multiple comparisons). *n* (left to right)=62, 55, 63, 62, 70, 32, 56, 51, 61, 36, 50, 46, 57, 31, 37, 60. (D) L1 larvae survival assays after UV-B irradiation with wild type, *xpf-1*, *gtf-2H5* and *xpf-1;gtf-2H5* animals. Mean with SEM of three independent experiments. Numbers represent p-values (ANOVA corrected for multiple comparisons). *n* (left to right)= WT:1000, 923, 857, 831; *xpf-1*:1100, 911, 879, 791; *gtf-2H5*:1050, 1594, 1377, 1412; *xpf-1;gtf-2H5*:1000, 1224, 954, 913. (E) Top panel shows alignment of a short fragment of human XPF with *C. elegans* XPF-1, indicating the *C. elegans* residue 719 that is changed from aspartic acid to alanine in the *xpf-1* D719A mutant. Lower panel shows the DNA sequence of the corresponding genomic region in wild type (WT) and *xpf-1* D719A mutants. (F) Top panel shows alignment of a short fragment of human XPF with *C. elegans* XPF-1, indicating the *C. elegans* residue 805

that is changed from arginine to tryptophan in the *xpf-1* R805W mutant. Lower panel shows the DNA sequence of the corresponding genomic region in wild type (WT) and *xpf-1* R805W mutants. **(G)** AID-GFP-tagged GTF-2H1 levels in oocyte and germ cell nuclei (arrowheads) of animals cultured without auxin or 24 h in the presence of 100  $\mu$ M auxin. Scale bar, 10  $\mu$ m. **(H)** Recovery of Protein Synthesis (RPS) assay in wild type, *xpc-1*, *csb-1* and *xpc-1;csb-1* animals. Shown are the AID::GFP fluorescence levels in head muscle cells of animals either untreated, after culturing for 2 h on 100  $\mu$ M auxin ('Depleted') or after culturing on 100  $\mu$ M auxin for 2 h and then irradiated with 120 J/m<sup>2</sup> UV-B and left to recover for 48 h ('UV + recovery'). Average values of from three independent experiments. Numbers represent p-values (ANOVA corrected for multiple comparisons). *n* (left to right)= 95, 91, 86, 104, 100, 101, 88, 88, 102, 93, 96, 110. Source data are provided as a Source Data file.

**Supplementary Table 1.** Cell lines

| Cell line      | Genotype                               | Reference                                 |
|----------------|----------------------------------------|-------------------------------------------|
| MRC-5          | GFP-XPB                                | Ribeiro-Silva <i>et al.</i> , 2020        |
| MRC-5          | GFP-XPB / XPA KO                       | <i>This study</i>                         |
| U2OS wild type | -                                      | -                                         |
| U2OS           | GFP-XPB                                | <i>This study</i>                         |
| U2OS           | GFP-XPB / XPF KO                       | <i>This study</i>                         |
| U2OS           | XPA KO                                 | <i>This study</i>                         |
| U2OS           | XPF KO                                 | Sabatella <i>et al.</i> , 2018            |
| U2OS           | XPA KO XPF KO                          | <i>This study</i>                         |
| U2OS           | GFP-XPB XPF-mCherry                    | <i>This study</i>                         |
| U2OS           | GFP-XPB XPF(P379S)-mCherry             | <i>This study</i>                         |
| U2OS           | GFP-XPB XPF(R799W)-mCherry             | <i>This study</i>                         |
| U2OS           | GFP-XPB XPF(C236R)-mCherry             | <i>This study</i>                         |
| U2OS           | GFP-XPB XPA KO                         | <i>This study</i>                         |
| U2OS           | BFP-Lamin B1 mScarlet-Lamin A          | <i>This study</i>                         |
| U2OS           | XPG KO / BFP-Lamin B1 mScarlet-Lamin A | <i>This study</i>                         |
| U2OS           | CSB-mClover                            | Llerena Schiffmacher <i>et al.</i> , 2023 |

**Supplementary Table 2.** Primary antibodies

| Antibody | Host | Source                   | Dilution |        |
|----------|------|--------------------------|----------|--------|
|          |      |                          | WB       | IF     |
| CPD      | Ms   | MBL international, TDM-2 | N.A.     | 1/1000 |
| H1.2     | Rb   | Abcam, ab17677           | 1/1000   | N.A.   |
| Lamin B1 | Rb   | Abcam, ab16048           | 1/1000   | N.A.   |
| Tubulin  | Ms   | Sigma Aldrich, B512      | 1/10000  | N.A.   |
| XPA      | Rb   | GeneTex, GTX103168       | 1/2000   | N.A.   |
| XPB      | Rb   | Abcam, Ab190698          | 1/1000   | 1/1000 |
| XPC      | Rb   | Bethyl, A301-121A        | 1/2000   | N.A.   |
| XPD      | Ms   | Abcam, ab54676           | 1/1000   | N.A.   |
| XPF      | Ms   | Santa Cruz, sc-136153    | 1/500    | N.A.   |
| XPG      | Rb   | Bethyl, A301-484A        | 1/1000   | N.A.   |

**Supplementary Table 3.** Secondary antibodies

| Antibody | Host | Source              | Dilution |            |
|----------|------|---------------------|----------|------------|
|          |      |                     | WB       | IRDye      |
| Rabbit   | Goat | Sigma, sab4600215   | 1/10000  | 770        |
| Rabbit   | Goat | Sigma, sab4600200   | 1/10000  | 680        |
| Mouse    | Goat | Sigma, sab4600199   | 1/10000  | 680        |
| Mouse    | Goat | Sigma, sab4600214   | 1/10000  | 770        |
| Antibody | Host | Source              | IF       | AlexaFluor |
| Rabbit   | Goat | Invitrogen, A-11034 | 1/1000   | 488        |
| Mouse    | Goat | Invitrogen, A-21424 | 1/1000   | 555        |

**Supplementary Table 4. *C. elegans* strains**

| <b>Strain</b> | <b>Genotype</b>                                                                                                 |
|---------------|-----------------------------------------------------------------------------------------------------------------|
| GJ1553        | <i>xpc-1(tm3886) IV</i>                                                                                         |
| GJ1564        | <i>xpf-1(tm2842) II</i>                                                                                         |
| GJ1566        | <i>xpa-1(ok698) I</i>                                                                                           |
| GJ2501        | <i>xpg-1(tm1682) I</i>                                                                                          |
| HAL26         | <i>csb-1(ok2335) X</i>                                                                                          |
| HAL94         | <i>gtf-2H5(tm6360) III</i>                                                                                      |
| HAL100        | <i>xpf-1(emc57[xpf-1::GFP]) II</i>                                                                              |
| HAL241        | <i>xpf-1(tm2842) II; emcSi70[P(unc-119)::TIR::mRuby] gtf-2H1(emc202[AID::GFP:: gtf-2H1]) IV</i>                 |
| HAL404        | <i>xpf-1(emc105[R805W]) emc57[xpf-1::GFP] II</i>                                                                |
| HAL407        | <i>xpa-1(ok698) I; xpf-1(tm2842) II</i>                                                                         |
| HAL409        | <i>xpg-1(tm1670) xpa-1(ok698) I</i>                                                                             |
| HAL410        | <i>xpf-1(tm2842) II; gtf-2H5(tm6360) III</i>                                                                    |
| HAL412        | <i>xpf-1(tm2842) II; xpc-1(tm3886) IV</i>                                                                       |
| HAL413        | <i>xpg-1(tm1670) I; xpc-1(tm3886) IV</i>                                                                        |
| HAL414        | <i>xpf-1(tm2842) II; csb-1(ok2335) X</i>                                                                        |
| HAL415        | <i>xpg-1(tm1670) I; csb-1(ok2335) X</i>                                                                         |
| HAL416        | <i>xpa-1(ok698) I; emcSi70[P(unc-119)::TIR::mRuby] gtf-2H1(emc202[AID::GFP:: gtf-2H1]) IV</i>                   |
| HAL417        | <i>xpa-1(ok698) I; xpf-1(tm2842) II; emcSi70[P(unc-119)::TIR::mRuby] gtf-2H1(emc202[AID::GFP:: gtf-2H1]) IV</i> |
| HAL418        | <i>xpf-1(tm2842) II; xpc-1(tm3886) IV; csb-1(ok2335) X</i>                                                      |
| HAL504        | <i>gtf-2H1(emc202[AID::GFP:: gtf-2H1]) IV</i>                                                                   |
| HAL526        | <i>ieSi57 [P(eft-3)::TIR1::mRuby] II; ieSi58 [P(eft-3)::AID::GFP] IV; csb-1(ok2335) X</i>                       |
| HAL534        | <i>ieSi57 [P(eft-3)::TIR1::mRuby] II; ieSi58 [P(eft-3)::AID::GFP] xpc-1(tm3886) IV</i>                          |
| HAL535        | <i>ieSi57 [P(eft-3)::TIR1::mRuby] II; ieSi58 [P(eft-3)::AID::GFP] IV; xpc-1(tm3886) IV; csb-1(ok2335) X</i>     |
| HAL805        | <i>xpf-1(emc98[D719A]) emc57[xpf-1::GFP]II</i>                                                                  |
| CA1202        | <i>ieSi57 [P(eft-3)::TIR1::mRuby] II; ieSi58 [P(eft-3)::AID::GFP] IV</i>                                        |
